# Supplementary material for: Ultra-sensitive determination of carcinogenic aflatoxins in food matrices using a novel magnetic bimetallic ZIF-8@chitosan sorbent and dispersive micro-solid phase extraction
Source: Royal Society of Chemistry journal article supplement (doi:10.1039/d5ra09926a), 2026-05-26
Supplement: d5ra09926a1.pdf [file d5ra09926a1.pdf]

## Electronic Supplementary Materials

### **Ultra-Sensitive Determination of Carcinogenic Aflatoxins in Food Matrices Using a Novel Magnetic Bimetallic ZIF-8@Chitosan Sorbent and Dispersive Micro-Solid Phase Extraction**

Alireza Shams<sup>1\*</sup>, Foroughalzaman Kazempoor Mofrad<sup>1</sup>, Mahdi Ghorbani<sup>2\*</sup>

<sup>1</sup> Department of Chemistry, Ma. C., Islamic Azad University, Mashhad, Iran

<sup>2</sup> Department of Chemistry, Faculty of Sciences, Ferdowsi University of Mashhad, Mashhad, Iran

**\* Corresponding authors.**

**Alireza Shams**

E-mail address: Farsh1358@gmail.com

**Mahdi Ghorbani**

E-mail address: ghorbani267@yahoo.com, ghorbani267@mail.um.ac.ir

Table S1. Effect of the sorbent type on the Aflatoxin extraction

| Sorbent | Fe <sub>3</sub> O <sub>4</sub> | Zn ZIF-8   | Bimetallic Co/Zn ZIF-8 | Bimetallic Co/Zn ZIF-8@ chitosan |
|---------|--------------------------------|------------|------------------------|----------------------------------|
| ER%±S   | 38.45±1.80                     | 59.02±2.16 | 61.96±1.94             | 79.46±1.52                       |

Table S2. Test of normality for analyzing the sorbent type results on the Aflatoxin extraction

| Sorbent                         | Kolmogorov-Smirnov <sup>a</sup> |    |      | Shapiro-Wilk |    |      |
|---------------------------------|---------------------------------|----|------|--------------|----|------|
|                                 | Statistic                       | df | Sig. | Statistic    | df | Sig. |
| Fe3O4                           | .191                            | 3  | .    | .997         | 3  | .901 |
| Zn ZIF-8                        | .214                            | 3  | .    | .989         | 3  | .802 |
| Bimetallic Co/Zn ZIF-8          | .175                            | 3  | .    | 1.000        | 3  | .990 |
| Bimetallic Co/Zn ZIF-8@chitosan | .204                            | 3  | .    | .993         | 3  | .845 |

a. Lilliefors Significance Correction

Table S3. ANOVA for analyzing the sorbent type results on the Aflatoxin extraction

|                | Sum of Squares | df | Mean Square | F      | Sig. |
|----------------|----------------|----|-------------|--------|------|
| Between Groups | 2543.570       | 3  | 847.857     | 80.968 | .000 |
| Within Groups  | 83.772         | 8  | 10.472      |        |      |
| Total          | 2627.343       | 11 |             |        |      |

Table S4. Tukey HSD for analyzing the sorbent type results on the Aflatoxin extraction

| (I) Sorbent                     | (J) Sorbent                     | Mean Difference (I-J) | Std. Error | Sig. | 95% Confidence Interval |              |
|---------------------------------|---------------------------------|-----------------------|------------|------|-------------------------|--------------|
|                                 |                                 |                       |            |      | Lower Bound             | Upper Bound  |
| Fe <sub>3</sub> O <sub>4</sub>  | Zn ZIF-8                        | -20.57667*            | 2.64216    | .000 | -29.0378                | -<br>12.1155 |
|                                 | Bimetallic Co/Zn ZIF-8          | -23.51333*            | 2.64216    | .000 | -31.9745                | -<br>15.0522 |
|                                 | Bimetallic Co/Zn ZIF-8@chitosan | -41.01667*            | 2.64216    | .000 | -49.4778                | -<br>32.5555 |
| Zn ZIF-8                        | Fe <sub>3</sub> O <sub>4</sub>  | 20.57667*             | 2.64216    | .000 | 12.1155                 | 29.0378      |
|                                 | Bimetallic Co/Zn ZIF-8          | -2.93667              | 2.64216    | .693 | -11.3978                | 5.5245       |
|                                 | Bimetallic Co/Zn ZIF-8@chitosan | -20.44000*            | 2.64216    | .000 | -28.9011                | -<br>11.9789 |
| Bimetallic Co/Zn ZIF-8          | Fe <sub>3</sub> O <sub>4</sub>  | 23.51333*             | 2.64216    | .000 | 15.0522                 | 31.9745      |
|                                 | Zn ZIF-8                        | 2.93667               | 2.64216    | .693 | -5.5245                 | 11.3978      |
|                                 | Bimetallic Co/Zn ZIF-8@chitosan | -17.50333*            | 2.64216    | .001 | -25.9645                | -9.0422      |
| Bimetallic Co/Zn ZIF-8@chitosan | Fe <sub>3</sub> O <sub>4</sub>  | 41.01667*             | 2.64216    | .000 | 32.5555                 | 49.4778      |
|                                 | Zn ZIF-8                        | 20.44000*             | 2.64216    | .000 | 11.9789                 | 28.9011      |
|                                 | Bimetallic Co/Zn ZIF-8          | 17.50333*             | 2.64216    | .001 | 9.0422                  | 25.9645      |

\*. The mean difference is significant at the 0.05 level.

Table S5. Effect of the desorption solvent type on the Aflatoxin extraction

| Solvent | Methanol   | Ethanol    | 2-Propanol | Acetonitrile | Acetone    |
|---------|------------|------------|------------|--------------|------------|
| ER%±S   | 79.46±1.52 | 78.42±1.63 | 78.27±1.95 | 87.40±1.21   | 69.29±2.13 |

Table S6. Test of normality for analyzing the desorption solvent type results on the Aflatoxin extraction

| Desorption solvent | Kolmogorov-Smirnov <sup>a</sup> |    |      | Shapiro-Wilk |    |      |
|--------------------|---------------------------------|----|------|--------------|----|------|
|                    | Statistic                       | df | Sig. | Statistic    | df | Sig. |
| Methanol           | .204                            | 3  | .    | .993         | 3  | .845 |
| Ethanol            | .205                            | 3  | .    | .993         | 3  | .839 |
| 1-propanol         | .322                            | 3  | .    | .880         | 3  | .324 |
| Acetonitrile       | .195                            | 3  | .    | .996         | 3  | .882 |
| Acetone            | .191                            | 3  | .    | .997         | 3  | .900 |

Table S7. ANOVA for analyzing the desorption solvent type results on the Aflatoxin extraction

|                | Sum of Squares | df | Mean Square | F      | Sig. |
|----------------|----------------|----|-------------|--------|------|
| Between Groups | 495.188        | 4  | 123.797     | 13.970 | .000 |
| Within Groups  | 88.614         | 10 | 8.861       |        |      |
| Total          | 583.803        | 14 |             |        |      |

Table S8. Tukey HSD for analyzing the desorption solvent type results on the Aflatoxin extraction

| (I)<br>Desorption<br>solvent | (J)<br>Desorption<br>solvent | Mean Difference<br>(I-J) | Std. Error | Sig.  | 95% Confidence Interval |                |
|------------------------------|------------------------------|--------------------------|------------|-------|-------------------------|----------------|
|                              |                              |                          |            |       | Lower<br>Bound          | Upper<br>Bound |
| Methanol                     | Ethanol                      | 1.04667                  | 2.43056    | .992  | -6.9525                 | 9.0458         |
|                              | 1-propanol                   | 1.19667                  | 2.43056    | .986  | -6.8025                 | 9.1958         |
|                              | Acetonitrile                 | -7.93667                 | 2.43056    | .052  | -15.9358                | .0625          |
|                              | Acetone                      | 10.17667*                | 2.43056    | .013  | 2.1775                  | 18.1758        |
| Ethanol                      | Methanol                     | -1.04667                 | 2.43056    | .992  | -9.0458                 | 6.9525         |
|                              | 1-propanol                   | .15000                   | 2.43056    | 1.000 | -7.8492                 | 8.1492         |
|                              | Acetonitrile                 | -8.98333*                | 2.43056    | .027  | -16.9825                | -.9842         |
|                              | Acetone                      | 9.13000*                 | 2.43056    | .024  | 1.1308                  | 17.1292        |
| 1-<br>propanol               | Methanol                     | -1.19667                 | 2.43056    | .986  | -9.1958                 | 6.8025         |
|                              | Ethanol                      | -.15000                  | 2.43056    | 1.000 | -8.1492                 | 7.8492         |
|                              | Acetonitrile                 | -9.13333*                | 2.43056    | .024  | -17.1325                | -1.1342        |
|                              | Acetone                      | 8.98000*                 | 2.43056    | .027  | .9808                   | 16.9792        |
| Acetonitrile                 | Methanol                     | 7.93667                  | 2.43056    | .052  | -.0625                  | 15.9358        |
|                              | Ethanol                      | 8.98333*                 | 2.43056    | .027  | .9842                   | 16.9825        |
|                              | 1-propanol                   | 9.13333*                 | 2.43056    | .024  | 1.1342                  | 17.1325        |
|                              | Acetone                      | 18.11333*                | 2.43056    | .000  | 10.1142                 | 26.1125        |
| Acetone                      | Methanol                     | -10.17667*               | 2.43056    | .013  | -18.1758                | -2.1775        |
|                              | Ethanol                      | -9.13000*                | 2.43056    | .024  | -17.1292                | -1.1308        |
|                              | 1-propanol                   | -8.98000*                | 2.43056    | .027  | -16.9792                | -.9808         |
|                              | Acetonitrile                 | -18.11333*               | 2.43056    | .000  | -26.1125                | -10.1142       |

\*. The mean difference is significant at the 0.05 level.

Table S9. Definitive screening design matrix for determining significant factors in Aflatoxin extraction

| Factor | Name                      | Units | SubType    | Minimum | Maximum | Mean   | Std. Dev. |
|--------|---------------------------|-------|------------|---------|---------|--------|-----------|
| A      | Sample solution volume    | mL    | Continuous | 10.00   | 20.00   | 15.00  | 4.68      |
| B      | pH                        | ---   | Continuous | 5.00    | 8.00    | 6.50   | 1.40      |
| C      | Sorbent amount            | mg    | Continuous | 30.00   | 50.00   | 40.00  | 9.35      |
| D      | Extraction time           | min   | Continuous | 5.00    | 10.00   | 7.50   | 2.34      |
| E      | Desorption solvent volume | μL    | Continuous | 100.00  | 300.00  | 200.00 | 93.54     |
| F      | Desorption time           | min   | Continuous | 10.00   | 15.00   | 12.50  | 2.34      |
| G      | NaCl percentage           | w/v%  | Continuous | 0.0000  | 5.00    | 2.50   | 2.34      |

| Standard run | Run | A  | B  | C  | D  | E  | F  | G  | ER%   |
|--------------|-----|----|----|----|----|----|----|----|-------|
| 3            | 1   | 1  | 0  | 1  | 1  | -1 | 1  | -1 | 84.18 |
| 12           | 2   | -1 | 1  | -1 | 1  | 1  | 0  | -1 | 66.68 |
| 17           | 3   | 0  | 0  | 0  | 0  | 0  | 0  | 0  | 65.23 |
| 4            | 4   | -1 | 0  | -1 | -1 | 1  | -1 | 1  | 63.14 |
| 13           | 5   | 1  | 1  | -1 | 1  | -1 | -1 | 0  | 83.59 |
| 11           | 6   | 1  | -1 | 1  | -1 | -1 | 0  | 1  | 63.81 |
| 8            | 7   | -1 | 1  | 1  | 0  | -1 | -1 | 1  | 82.32 |
| 10           | 8   | -1 | -1 | 1  | 1  | 0  | -1 | -1 | 61.75 |
| 6            | 9   | -1 | 1  | 0  | -1 | -1 | 1  | -1 | 74.63 |
| 15           | 10  | 1  | 1  | 1  | -1 | 1  | -1 | -1 | 58.47 |
| 9            | 11  | 1  | 1  | -1 | -1 | 0  | 1  | 1  | 67.56 |
| 5            | 12  | 1  | -1 | 0  | 1  | 1  | -1 | 1  | 58.09 |
| 14           | 13  | -1 | -1 | 1  | -1 | 1  | 1  | 0  | 61.27 |
| 2            | 14  | 0  | -1 | -1 | -1 | -1 | -1 | -1 | 55.08 |
| 16           | 15  | -1 | -1 | -1 | 1  | -1 | 1  | 1  | 73.12 |
| 1            | 16  | 0  | 1  | 1  | 1  | 1  | 1  | 1  | 79.53 |
| 7            | 17  | 1  | -1 | -1 | 0  | 1  | 1  | -1 | 65.17 |

Table S10. ANOVA for determining significant factors in Aflatoxin extraction

| Source                      | Sum of Squares | df | Mean Square | F-value | p-value | significant |
|-----------------------------|----------------|----|-------------|---------|---------|-------------|
| <b>Model</b>                | 1162.18        | 7  | 166.03      | 6.06    | 0.0077  | +           |
| A-Sample solution volume    | 0.2973         | 1  | 0.2973      | 0.0109  | 0.9193  | -           |
| B-pH                        | 396.34         | 1  | 396.34      | 14.47   | 0.0042  | +           |
| C-Sorbent amount            | 20.62          | 1  | 20.62       | 0.7527  | 0.4081  | -           |
| D-Extraction time           | 283.32         | 1  | 283.32      | 10.34   | 0.0106  | +           |
| E-Desorption solvent volume | 296.06         | 1  | 296.06      | 10.81   | 0.0094  | +           |
| F-Desorption time           | 132.19         | 1  | 132.19      | 4.83    | 0.0556  | -           |
| G-NaCl percentage           | 33.36          | 1  | 33.36       | 1.22    | 0.2984  | -           |
| <b>Residual</b>             | 246.52         | 9  | 27.39       |         |         |             |
| <b>Cor Total</b>            | 1408.70        | 16 |             |         |         |             |

Table S11. ANOVA for determining significant factors or binary interactions in Aflatoxin extraction

| Source                      | Sum of Squares | df | Mean Square | F-value | p-value  | Significant |
|-----------------------------|----------------|----|-------------|---------|----------|-------------|
| <b>Model</b>                | 4369.52        | 9  | 485.50      | 63.87   | < 0.0001 | +           |
| A-pH                        | 388.13         | 1  | 388.13      | 51.06   | < 0.0001 | +           |
| B-Extraction time           | 749.96         | 1  | 749.96      | 98.66   | < 0.0001 | +           |
| C-Desorption solvent volume | 685.92         | 1  | 685.92      | 90.23   | < 0.0001 | +           |
| AB                          | 180.50         | 1  | 180.50      | 23.75   | 0.0006   | +           |
| AC                          | 0.6272         | 1  | 0.6272      | 0.0825  | 0.7798   | -           |
| BC                          | 70.09          | 1  | 70.09       | 9.22    | 0.0125   | +           |
| A <sup>2</sup>              | 175.72         | 1  | 175.72      | 23.12   | 0.0007   | +           |
| B <sup>2</sup>              | 247.86         | 1  | 247.86      | 32.61   | 0.0002   | +           |
| C <sup>2</sup>              | 154.84         | 1  | 154.84      | 20.37   | 0.0011   | +           |
| <b>Residual</b>             | 76.02          | 10 | 7.60        |         |          |             |
| Lack of Fit                 | 58.15          | 5  | 11.63       | 3.26    | 0.1105   | -           |
| Pure Error                  | 17.86          | 5  | 3.57        |         |          |             |
| <b>Cor Total</b>            | 4445.54        | 19 |             |         |          |             |

Table S12. Goodness-of-fit statistics for the quadratic model of aflatoxin extraction recovery.

|                  |       |                                |         |
|------------------|-------|--------------------------------|---------|
| <b>Std. Dev.</b> | 2.76  | <b>R<sup>2</sup></b>           | 0.9829  |
| <b>Mean</b>      | 80.18 | <b>Adjusted R<sup>2</sup></b>  | 0.9675  |
| <b>C.V. %</b>    | 3.44  | <b>Predicted R<sup>2</sup></b> | 0.8596  |
|                  |       | <b>Adeq Precision</b>          | 24.3293 |

Table S13. The optimum condition for the significant factors on the Aflatoxin extraction

| Factor | Name                      | Optimum Level |
|--------|---------------------------|---------------|
| A      | pH                        | 7.41          |
| B      | Extraction time           | 8.17          |
| C      | Desorption solvent volume | 123.33        |

**Point Prediction**

Two-sided Confidence = 95% Population = 99%

| Solution 1 of 100 Response | Predicted Mean | Predicted Median | Observed | Std Dev | SE Mean | 95% CI low for Mean | 95% CI high for Mean | 95% TI low for 99% Pop | 95% TI high for 99% Pop |
|----------------------------|----------------|------------------|----------|---------|---------|---------------------|----------------------|------------------------|-------------------------|
| ER%                        | 97.6896        | 97.6896          |          | 2.75709 | 1.17894 | 95.0628             | 100.316              | 84.2392                | 111.14                  |
